# Supplementary material for: FoxO3a as a Positive Prognostic Marker and a Therapeutic Target in Tamoxifen-Resistant Breast Cancer
Source: MDPI journal article supplement (doi:10.3390/cancers11121858), 2019-11-25
Supplement: s1 [file s1]

**FIGURE 1**

**Panel B**

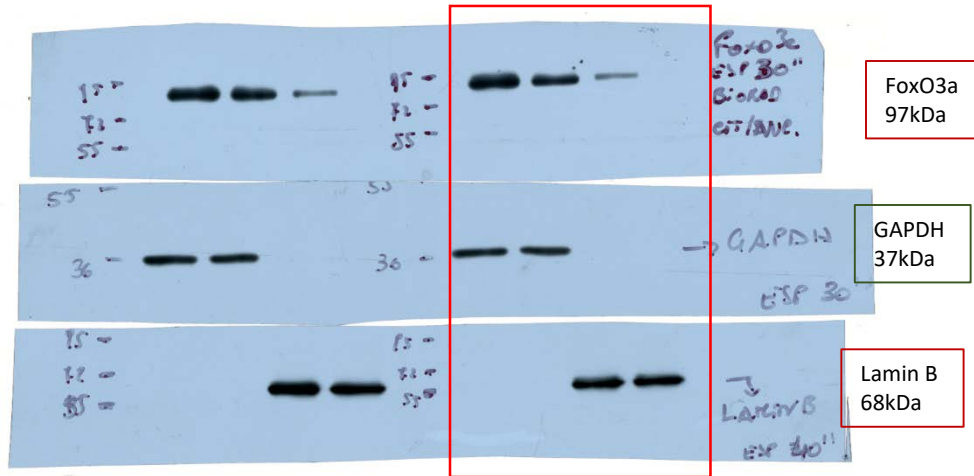

| Lane    | 1   | 2   | 3   | 4  |
|---------|-----|-----|-----|----|
| Foxo3a  | 23  | 15  | 7   | 0  |
| GAPDH   | 15  | 13  |     |    |
| Lamin B |     |     | 23  | 20 |
| Ratio   | 1,5 | 1,1 | 0,3 | 0  |

# FIGURE 1 Panel D

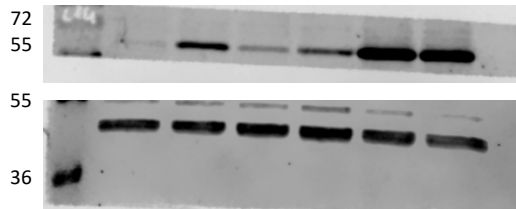

pAkt 60kDa

ACTIN  
42kDa

| Lane  | 1    | 2    | 3    | 4    | 5    | 6    |
|-------|------|------|------|------|------|------|
| pAkt  | 1    | 22   | 6    | 13   | 41   | 38   |
| Actin | 22   | 24   | 26   | 30   | 24   | 22   |
| Ratio | 0,04 | 0,91 | 0,23 | 0,43 | 1,70 | 1,72 |

| Lane  | 1    | 2    | 3    | 4    | 5    | 6    |
|-------|------|------|------|------|------|------|
| pAkt  | 0,04 | 0,91 | 0,23 | 0,43 | 1,70 | 1,72 |
| Akt   | 1,05 | 1,21 | 0,86 | 0,98 | 1,07 | 0,98 |
| Ratio | 0,04 | 0,75 | 0,27 | 0,44 | 1,59 | 1,76 |

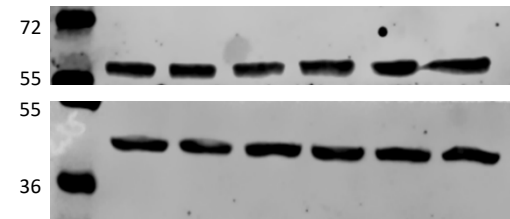

Akt 60kDa

ACTIN  
42kDa

| Lane  | 1    | 2    | 3    | 4    | 5    | 6    |
|-------|------|------|------|------|------|------|
| Akt   | 40   | 41   | 38   | 43   | 46   | 43   |
| Actin | 38   | 34   | 44   | 44   | 43   | 44   |
| Ratio | 1,05 | 1,21 | 0,86 | 0,98 | 1,07 | 0,98 |

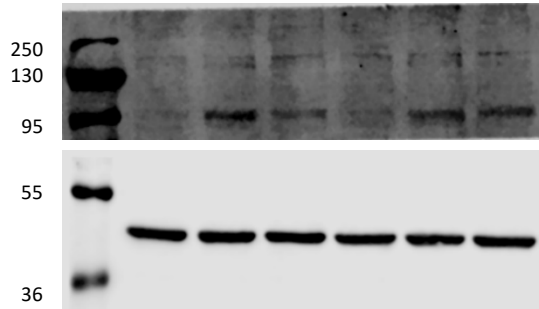

pFoxO3a  
(Akt-dip)  
97kDa

ACTIN  
42kDa

This Actin was used in figure as  
representative of each Actin evaluated

| Lane    | 1    | 2    | 3    | 4    | 5    | 6    |
|---------|------|------|------|------|------|------|
| pFoxO3a | 2    | 23   | 9    | 5    | 20   | 21   |
| Actin   | 28   | 31   | 28   | 26   | 27   | 29   |
| Ratio   | 0,07 | 0,74 | 0,32 | 0,19 | 0,74 | 0,72 |

| Lane    | 1    | 2    | 3    | 4    | 5    | 6    |
|---------|------|------|------|------|------|------|
| pFoxO3a | 0,07 | 0,74 | 0,32 | 0,19 | 0,74 | 0,72 |
| FoxO3a  | 0,55 | 0,48 | 0,37 | 0,12 | 0,21 | 0,17 |
| Ratio   | 0,13 | 1,54 | 0,86 | 1,58 | 3,52 | 4,24 |

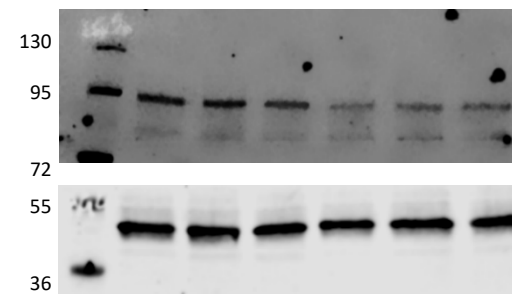

FoxO3a  
97kDa

ACTIN  
42kDa

| Lane   | 1    | 2    | 3    | 4    | 5    | 6    |
|--------|------|------|------|------|------|------|
| FoxO3a | 16   | 14   | 11   | 3    | 6    | 5    |
| Actin  | 29   | 29   | 30   | 26   | 29   | 30   |
| Ratio  | 0,55 | 0,48 | 0,37 | 0,12 | 0,21 | 0,17 |

# FIGURE 1 Panel E

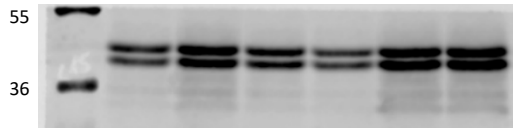

pMAPK 42-44kDa

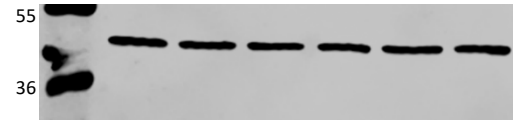

ACTIN  
42kDa

This Actin was used in figure as representative of each Actin evaluated

| Lane  | 1   | 2   | 3   | 4   | 5   | 6   |
|-------|-----|-----|-----|-----|-----|-----|
| pMAPK | 14  | 28  | 17  | 11  | 30  | 29  |
| Actin | 14  | 12  | 12  | 14  | 13  | 14  |
| Ratio | 0,8 | 2,3 | 1,4 | 0,8 | 2,3 | 2,1 |

| Lane        | 1   | 2   | 3   | 4   | 5   | 6   |
|-------------|-----|-----|-----|-----|-----|-----|
| Ratio pMAPK | 0,8 | 2,3 | 1,4 | 0,8 | 2,3 | 2,1 |
| Ratio MAPK  | 1,5 | 1,4 | 1,3 | 1,3 | 1,5 | 1,4 |
| Ratio       | 0,5 | 1,6 | 1,0 | 0,6 | 1,5 | 1,5 |

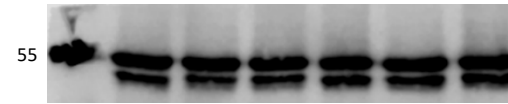

MAPK  
42-44kDa

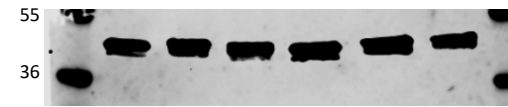

ACTIN  
42kDa

| Lane  | 1   | 2   | 3   | 4   | 5   | 6   |
|-------|-----|-----|-----|-----|-----|-----|
| MAPK  | 28  | 29  | 27  | 28  | 30  | 28  |
| Actin | 19  | 20  | 20  | 21  | 20  | 20  |
| Ratio | 1,5 | 1,4 | 1,3 | 1,3 | 1,5 | 1,4 |

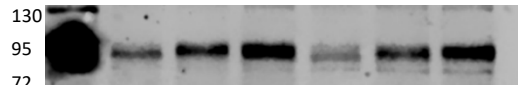

pFoxO3a  
(MAP-dip)  
97kDa

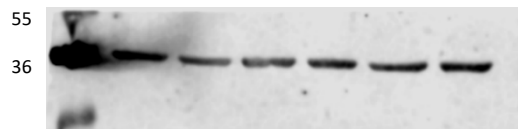

GAPDH  
37kDa

| Lane    | 1   | 2   | 3   | 4   | 5   | 6   |
|---------|-----|-----|-----|-----|-----|-----|
| pFoxO3a | 14  | 22  | 29  | 8   | 20  | 27  |
| Actin   | 17  | 14  | 15  | 15  | 14  | 14  |
| Ratio   | 0,8 | 1,6 | 1,9 | 0,5 | 1,4 | 1,9 |

| Lane          | 1   | 2   | 3   | 4   | 5   | 6   |
|---------------|-----|-----|-----|-----|-----|-----|
| Ratio pFoxO3a | 0,8 | 1,6 | 1,9 | 0,5 | 1,4 | 1,9 |
| Ratio FoxO3a  | 1,2 | 1,3 | 0,7 | 0,7 | 0,8 | 0,7 |
| Ratio         | 0,7 | 1,2 | 2,7 | 0,7 | 1,8 | 2,7 |

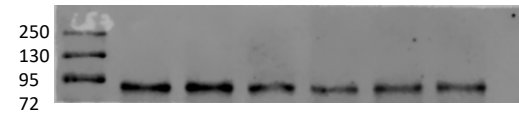

FoxO3a  
97kDa

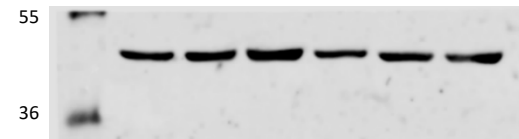

ACTIN  
42kDa

| Lane   | 1   | 2   | 3   | 4   | 5   | 6   |
|--------|-----|-----|-----|-----|-----|-----|
| FoxO3a | 18  | 20  | 12  | 10  | 12  | 11  |
| Actin  | 15  | 15  | 17  | 14  | 15  | 16  |
| Ratio  | 1,2 | 1,3 | 0,7 | 0,7 | 0,8 | 0,7 |

# FIGURE 1 Panel G

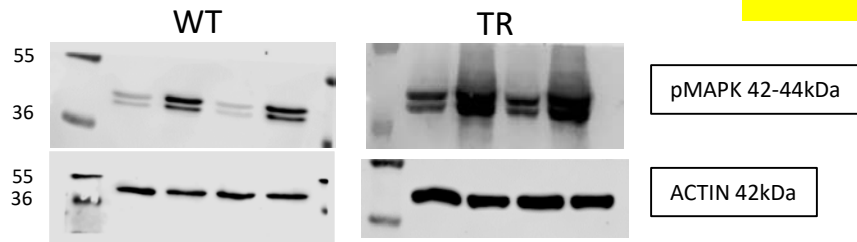

This Actin was used in figure as representative of each Actin evaluated

| Lane  | 1   | 2   | 3   | 4   | 5   | 6   | 7   | 8   |
|-------|-----|-----|-----|-----|-----|-----|-----|-----|
| pMAPK | 5   | 26  | 3   | 37  | 41  | 123 | 40  | 117 |
| Actin | 21  | 17  | 18  | 17  | 26  | 24  | 26  | 25  |
| Ratio | 0,2 | 1,5 | 0,2 | 2,1 | 1,6 | 5,1 | 1,5 | 4,7 |

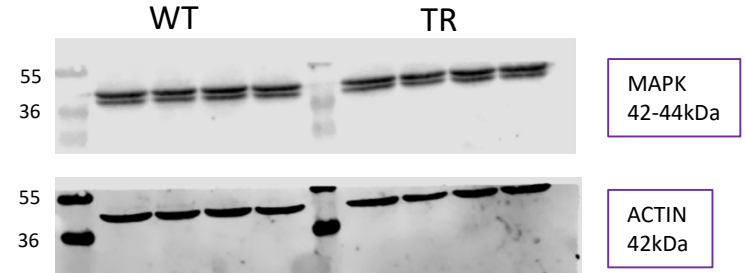

| Lane  | 1   | 2   | 3   | 4   | 5   | 6   | 7   | 8   |
|-------|-----|-----|-----|-----|-----|-----|-----|-----|
| MAPK  | 29  | 29  | 31  | 30  | 26  | 24  | 28  | 30  |
| Actin | 20  | 20  | 22  | 21  | 17  | 15  | 17  | 16  |
| Ratio | 1,4 | 1,4 | 1,4 | 1,4 | 1,5 | 1,6 | 1,6 | 1,8 |

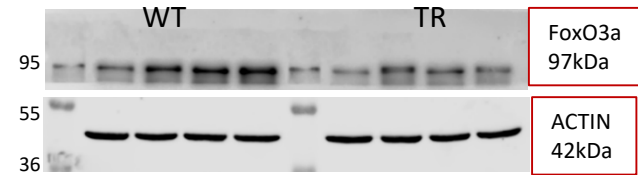

| Lane   | 1   | 2   | 3   | 4   | 5   | 6   | 7   | 8   |
|--------|-----|-----|-----|-----|-----|-----|-----|-----|
| FoxO3a | 10  | 14  | 16  | 20  | 7   | 10  | 9   | 9   |
| Actin  | 22  | 20  | 21  | 20  | 22  | 20  | 20  | 20  |
| Ratio  | 0,5 | 0,7 | 0,8 | 1,0 | 0,3 | 0,5 | 0,5 | 0,5 |

| Lane       | 1   | 2   | 3   | 4   | 5   | 6   | 7   | 8   |
|------------|-----|-----|-----|-----|-----|-----|-----|-----|
| Ratio pMAP | 0,2 | 1,5 | 0,2 | 2,1 | 1,6 | 5,1 | 1,5 | 4,7 |
| Ratio MAP  | 1,4 | 1,4 | 1,4 | 1,4 | 1,5 | 1,6 | 1,6 | 1,8 |
| Ratio      | 0,1 | 1,1 | 0,1 | 1,5 | 1,1 | 3,2 | 0,9 | 2,6 |

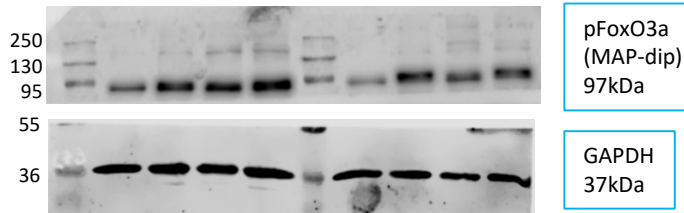

| Lane    | 1   | 2   | 3  | 4   | 5   | 6   | 7   | 8   |
|---------|-----|-----|----|-----|-----|-----|-----|-----|
| pFoxO3a | 15  | 27  | 29 | 33  | 8   | 27  | 18  | 23  |
| Actin   | 28  | 31  | 29 | 31  | 21  | 22  | 16  | 16  |
| Ratio   | 0,5 | 0,9 | 1  | 1,1 | 0,4 | 1,2 | 1,1 | 1,5 |

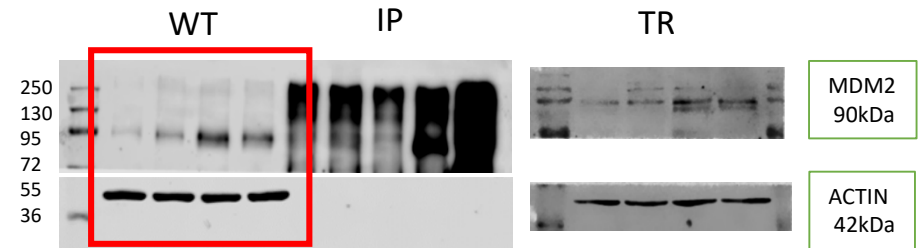

This Actin was used in figure as representative of each Actin evaluated

| Lane  | 1   | 2   | 3   | 4   | 5   | 6   | 7   | 8   |
|-------|-----|-----|-----|-----|-----|-----|-----|-----|
| MDM2  | 3   | 7   | 16  | 14  | 6   | 8   | 14  | 13  |
| Actin | 21  | 18  | 20  | 17  | 12  | 11  | 11  | 12  |
| Ratio | 0,1 | 0,4 | 0,8 | 0,8 | 0,5 | 0,7 | 1,3 | 1,1 |

# FIGURE 2

## Panel B

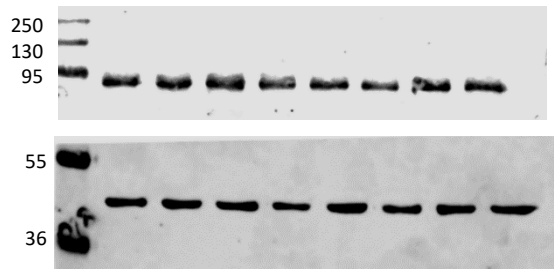

FoxO3a  
97kDa

ACTIN  
42kDa

| Lane   | 1   | 2   | 3   | 4   | 5   | 6   | 7   | 8   |
|--------|-----|-----|-----|-----|-----|-----|-----|-----|
| FoxO3a | 15  | 17  | 25  | 22  | 14  | 13  | 18  | 16  |
| Actin  | 22  | 23  | 23  | 18  | 24  | 20  | 22  | 23  |
| Ratio  | 0,7 | 0,7 | 1,1 | 1,2 | 0,6 | 0,7 | 0,8 | 0,7 |

## Panel D

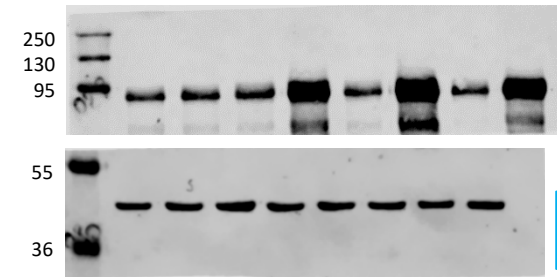

FoxO3a  
97kDa

ACTIN  
42kDa

| Lane   | 1   | 2   | 3   | 4   | 5   | 6   | 7   | 8   |
|--------|-----|-----|-----|-----|-----|-----|-----|-----|
| FoxO3a | 10  | 11  | 9   | 24  | 11  | 32  | 10  | 27  |
| Actin  | 9   | 10  | 14  | 11  | 11  | 10  | 9   | 11  |
| Ratio  | 1,1 | 1,1 | 0,6 | 2,2 | 1,0 | 3,2 | 1,1 | 2,5 |

## Panel C

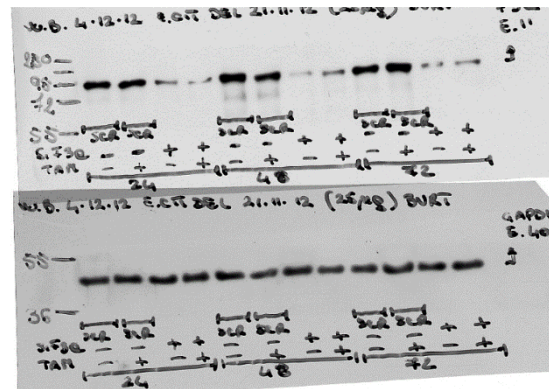

FoxO3a  
97kDa

GAPDH  
37kDa

| Lane   | 1   | 2   | 3   | 4   | 5   | 6   | 7   | 8   | 9   | 10  | 11  | 12  |
|--------|-----|-----|-----|-----|-----|-----|-----|-----|-----|-----|-----|-----|
| FoxO3a | 25  | 26  | 12  | 12  | 27  | 28  | 14  | 13  | 26  | 27  | 11  | 15  |
| Actin  | 27  | 26  | 26  | 26  | 27  | 25  | 25  | 29  | 29  | 25  | 27  | 26  |
| Ratio  | 0,9 | 1,0 | 0,5 | 0,5 | 1,0 | 1,1 | 0,6 | 0,4 | 0,9 | 1,1 | 0,4 | 0,6 |

**FIGURE 2**

**Panel I**

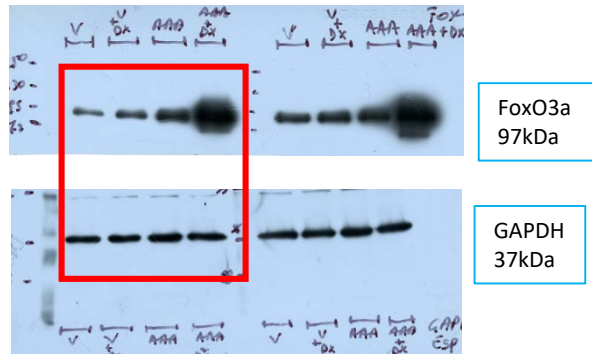

| Lane   | 1   | 2   | 3   | 4   |
|--------|-----|-----|-----|-----|
| Foxo3a | 8   | 13  | 105 | 787 |
| GAPDH  | 17  | 18  | 22  | 20  |
| Ratio  | 0,5 | 0,7 | 4,8 | 39  |

**Panel K**

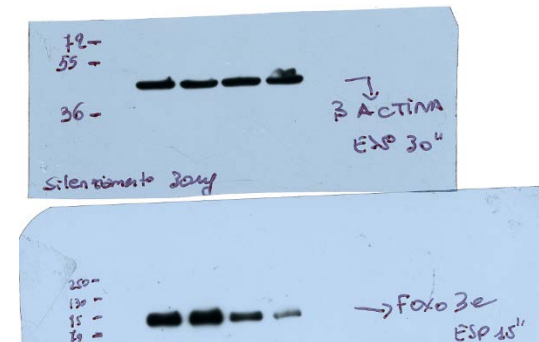

| Lane   | 1   | 2   | 3  | 4  |
|--------|-----|-----|----|----|
| Foxo3a | 30  | 52  | 16 | 8  |
| Actin  | 18  | 17  | 19 | 22 |
| Ratio  | 1,2 | 1,1 | 0  | 0  |

**FIGURE 2**

**Panel O**

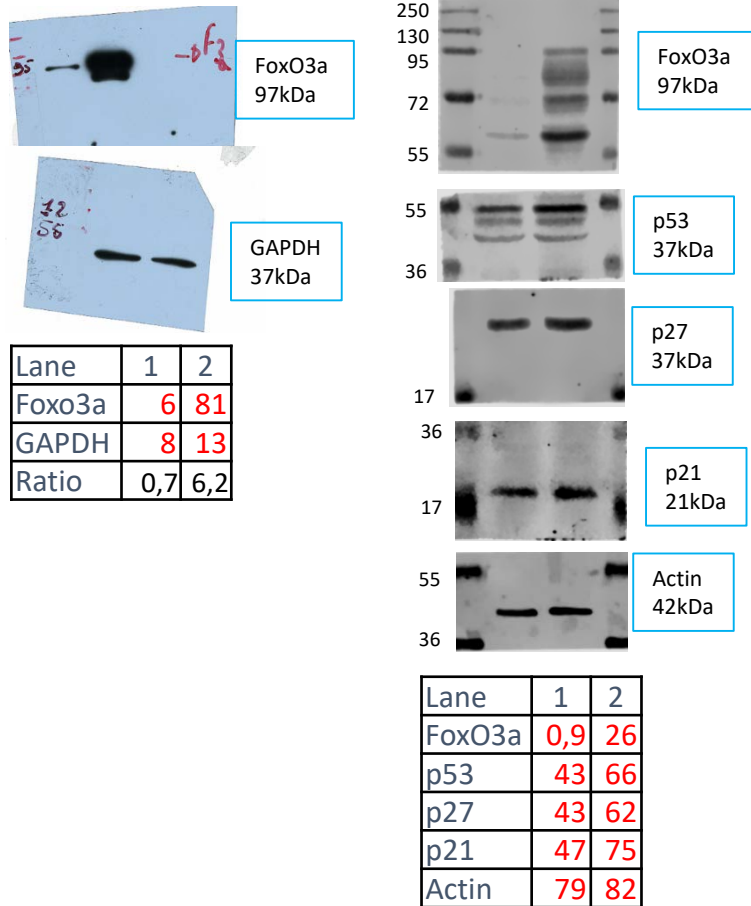

**Panel P**

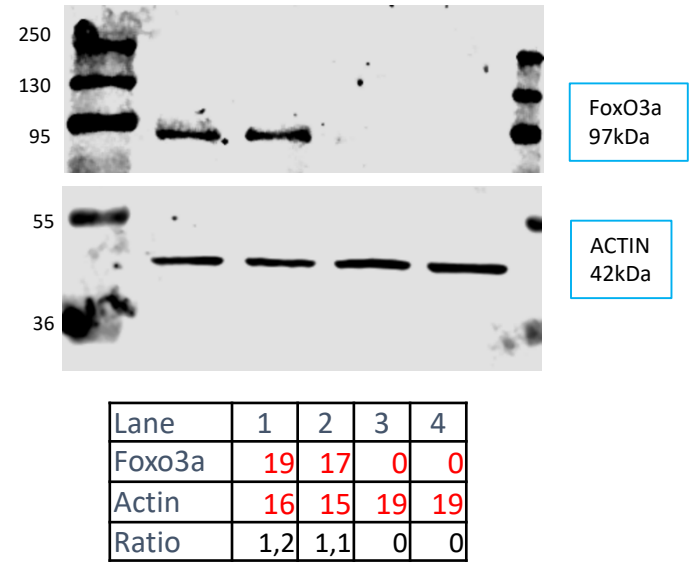

FIGURE 4

Panel E

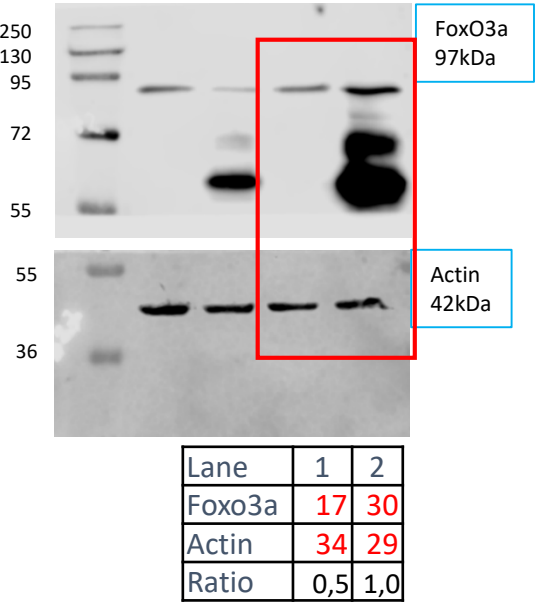

Panel F

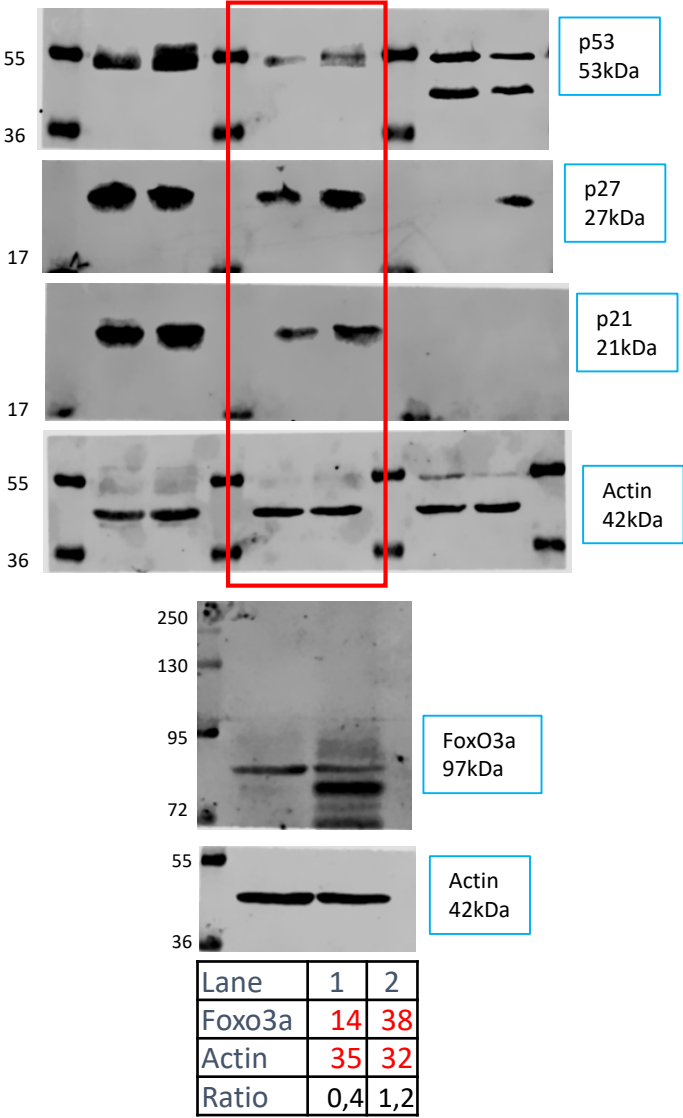



**FIGURE 6**

**Panel F**

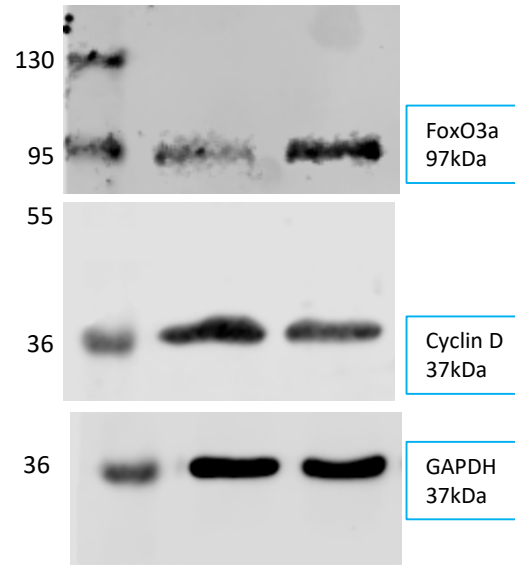

| Lane      | 1   | 2   |
|-----------|-----|-----|
| Foxo3a    | 25  | 52  |
| Cyclin D  | 70  | 40  |
| GAPDH     | 70  | 66  |
| Ratio Fox | 0,4 | 0,8 |
| Ratio Cyc | 1   | 0,6 |

**FIGURE S1**

**Panel C**

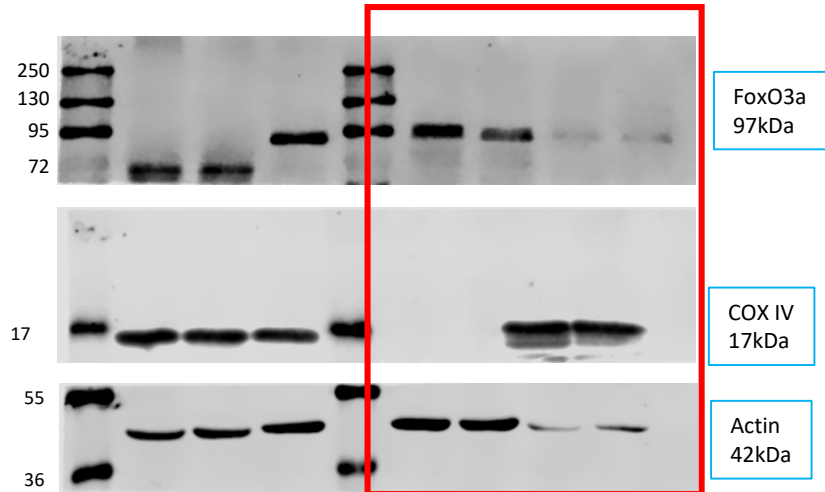

| Lane   | 1   | 2   | 3    | 4    |
|--------|-----|-----|------|------|
| Foxo3a | 17  | 10  | 1,2  | 1,3  |
| COX IV | 0   | 0   | 22   | 19   |
| Actin  | 19  | 17  | 2,1  | 4,4  |
| Ratio  | 0,9 | 0,6 | 0,05 | 0,07 |

**FIGURE S2**

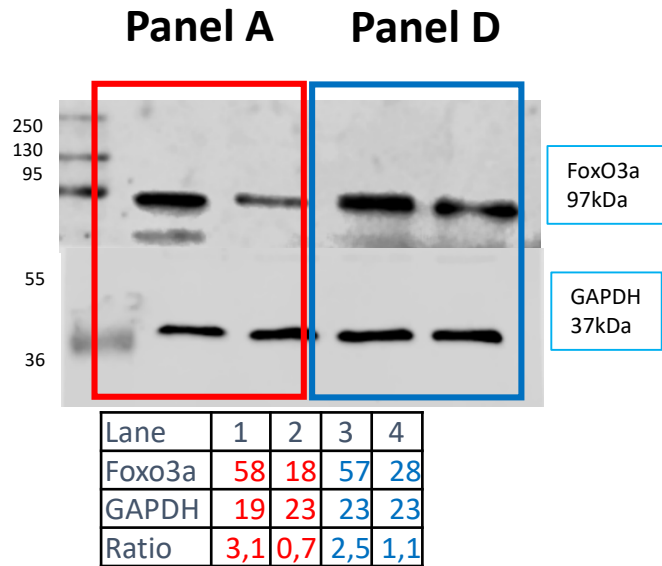

**Panel C**

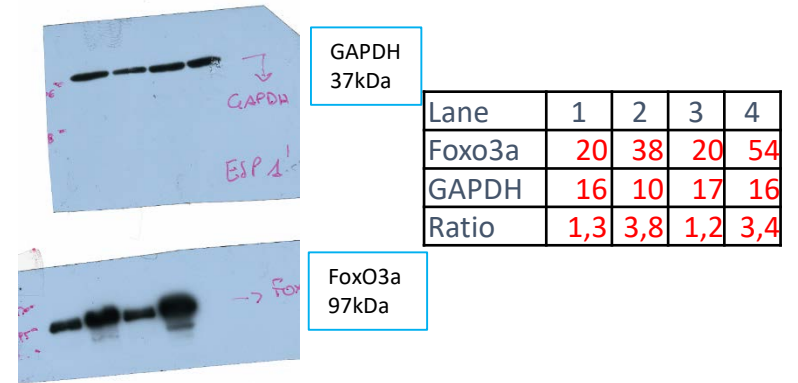

**Panel F**

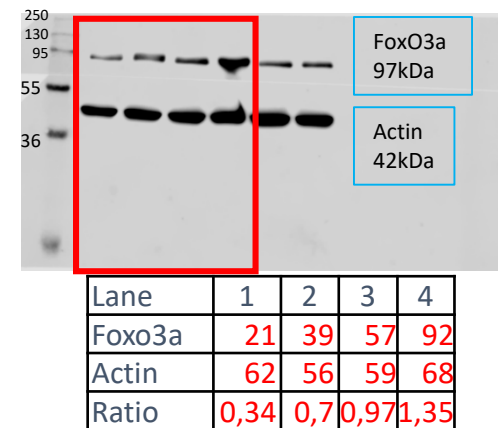

**FIGURE S4**

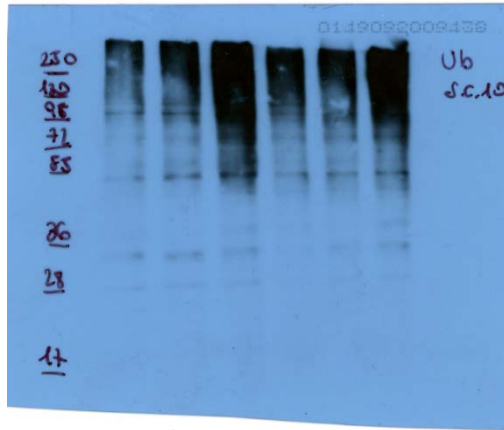

IB: Ub  
97kDa

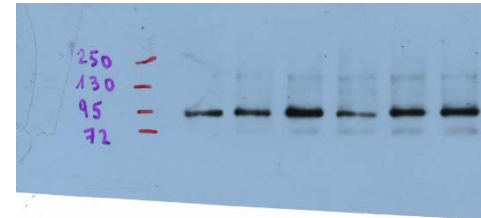

FoxO3a  
97kDa

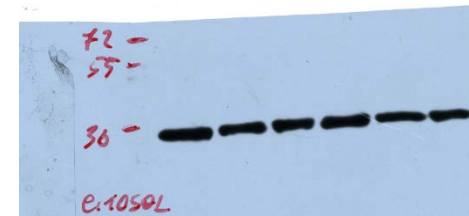

GAPDH  
37kDa

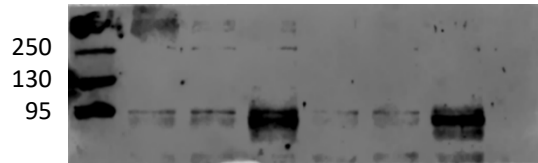

MDM-2  
90kDa

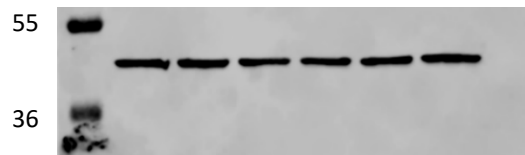

Actin  
42kDa

| Lane        | 1   | 2   | 3   | 4    | 5    | 6   |
|-------------|-----|-----|-----|------|------|-----|
| Ub          | 22  | 43  | 89  | 52   | 56   | 77  |
| MDM-2       | 1,3 | 2,3 | 12  | 0,4  | 1,1  | 12  |
| Actin       | 16  | 17  | 15  | 16   | 16   | 17  |
| Ratio Ub    | 1,4 | 2,5 | 5,9 | 3,2  | 3,5  | 4,5 |
| Ratio MDM-2 | 0,2 | 0,1 | 0,8 | 0,02 | 0,06 | 0,7 |

| Lane   | 1   | 2   | 3    | 4   | 5   | 6   |
|--------|-----|-----|------|-----|-----|-----|
| FoxO3a | 8,7 | 10  | 19,7 | 6,8 | 13  | 15  |
| GAPDH  | 25  | 17  | 22   | 26  | 20  | 20  |
| Ratio  | 0,3 | 0,6 | 0,9  | 0,2 | 0,6 | 0,7 |
